# Supplementary material for: Heterogeneity in Staphylococcus aureus Bacteraemia Clinical Trials Complicates Interpretation of Findings
Source: PubMed Central journal article supplement (PMC9441204; doi:10.1093/infdis/jiac219), 2022-05-27
Supplement: jiac219_supplementary_data.pdf [file jiac219_supplementary_data.pdf]

# Heterogeneity In *Staphylococcus aureus* Bacteraemia Clinical Trials Complicates Interpretation Of Findings

## Supplementary Material

### Contents:

|                                                                                                     |    |
|-----------------------------------------------------------------------------------------------------|----|
| Supplementary Table 1: Search key words .....                                                       | 2  |
| Supplementary Table 2: Criteria used to identify RCTs of medical therapy for non-selected SAB ..... | 3  |
| Supplementary Table 3: Summary of 15 included SAB RCTs .....                                        | 4  |
| Supplementary Table 4: Included observational cohort studies (n=14) .....                           | 5  |
| Supplementary Table 5: Clinically-relevant poorly justified exclusion criteria .....                | 6  |
| Supplementary Table 6: Microbiologic outcome definitions .....                                      | 7  |
| Supplementary Table 7: SAB RCT and observational study 84-90d mortality .....                       | 8  |
| Supplementary Figure 1: Flow diagram of study identification .....                                  | 9  |
| Supplementary Figure 2: Cumulative recruitment to SAB RCTs .....                                    | 10 |
| Supplementary Figure 3: Comparison of registrational and strategy trials .....                      | 11 |
| Supplementary Figure 4: Variation in <i>S. aureus</i> sequence types between trials .....           | 12 |
| Supplementary Figure 5: Network analysis of SAB RCT cohort characteristics .....                    | 13 |
| Supplementary Figure 6: SAB RCT and observational study cohort characteristics .....                | 14 |
| Supplementary references.....                                                                       | 15 |

### Supplementary Table 1: Search key words

((“staphylococcus aureus” OR “s. aureus” OR “MRSA” OR “aureus” OR “MSSA” OR “staphylococc\*”)  
AND (“bacteraemia” OR “bloodstream” OR “bacteremia” OR “BSI” OR “blood” OR “sepsis” OR “septicemia” OR “septicaemia” OR “intravascular”)) AND “trial”.

No date restriction on search

Search performed on 12/07/2021

**Supplementary Table 2: Criteria used to identify RCTs of medical therapy for non-selected SAB**

| <b>Inclusion criteria</b>                                                                                                                                                                                                                                                                                                                      | <b>Exclusion criteria</b>                                                                                                                                                                                                                                                                                                                                                                                                                                                                                                         |
|------------------------------------------------------------------------------------------------------------------------------------------------------------------------------------------------------------------------------------------------------------------------------------------------------------------------------------------------|-----------------------------------------------------------------------------------------------------------------------------------------------------------------------------------------------------------------------------------------------------------------------------------------------------------------------------------------------------------------------------------------------------------------------------------------------------------------------------------------------------------------------------------|
| <ul style="list-style-type: none"><li>• Blood culture confirmed SAB</li><li>• Included MSSA, MRSA or both</li><li>• RCT of medical therapy (including conventional antimicrobials or novel therapies)</li><li>• Any phase of trial</li><li>• Recruited adults (<math>\geq 16</math> years)</li><li>• Recruited hospitalised patients</li></ul> | <ul style="list-style-type: none"><li>• Not English language</li><li>• No control arm (usual care or placebo)</li><li>• Observational studies</li><li>• PK/PD studies</li><li>• Secondary analyses of other trials</li><li>• No full text available</li><li>• Included polymicrobial bacteraemias</li><li>• Included <i>S. aureus</i> infections without blood culture confirmed bacteraemia</li><li>• Exclusively recruited SAB from one source (e.g., only IV catheter-related bacteraemia or infective endocarditis)</li></ul> |

PK: pharmacokinetic; PD: pharmacodynamic

**Supplementary Table 3: Summary of 15 included SAB RCTs**

| Trial                                | Recruitment location(s)                                                                             | Funding                | Category            | Purpose        | Intervention                                | N screened | N included | N control* | N intervention* | Completed as planned |
|--------------------------------------|-----------------------------------------------------------------------------------------------------|------------------------|---------------------|----------------|---------------------------------------------|------------|------------|------------|-----------------|----------------------|
| Fowler <i>et al</i> , 2006 [1]       | USA, Belgium, Lebanon, Germany                                                                      | Industry-sponsored     | Primary therapy     | Registrational | Daptomycin vs. SOC                          | –          | 246        | 115        | 120             | Yes                  |
| Ruotsalainen <i>et al</i> , 2006 [2] | Finland                                                                                             | Investigator-initiated | Combination therapy | Strategy       | Adjunctive levofloxacin                     | 1226       | 381        | 190        | 191             | Yes                  |
| Weems <i>et al</i> , 2006[3]         | USA                                                                                                 | Industry-sponsored     | Novel approach      | Registrational | Adjunctive tefibazumab                      | –          | 63         | 30         | 30              | Yes                  |
| Rupp <i>et al</i> , 2007 [4]         | USA                                                                                                 | Industry-sponsored     | Novel approach      | Registrational | Adjunctive Altastaph                        | –          | 40         | 18         | 21              | Yes                  |
| Stryjewski <i>et al</i> , 2014 [5]   | USA, Argentina, Spain, Singapore, Hong Kong                                                         | Industry-sponsored     | Primary therapy     | Registrational | Telavancin vs. SOC                          | –          | 60         | 29         | 29              | Yes                  |
| Davis <i>et al</i> , 2016 [6]        | Australia                                                                                           | Investigator-initiated | Combination therapy | Strategy       | Vancomycin ± flucloxacillin (MRSA)          | 380        | 60         | 29         | 31              | Yes                  |
| Kalimuddin <i>et al</i> , 2018 [7]   | Singapore                                                                                           | Investigator-initiated | Primary therapy     | Registrational | Daptomycin vs. vancomycin (MRSA)            | 170        | 14         | 7          | 7               | No (recruitment)     |
| Pericas <i>et al</i> , 2018 [8]      | Spain                                                                                               | Investigator-initiated | Combination therapy | Strategy       | Fosfomycin + imipenem vs. vancomycin (MRSA) | 201        | 15         | 7          | 8               | No (recruitment)     |
| Thwaites <i>et al</i> , 2018 [9]     | UK                                                                                                  | Investigator-initiated | Combination therapy | Strategy       | Adjunctive rifampicin                       | 2896       | 770        | 388        | 370             | Yes                  |
| Peetermans <i>et al</i> , 2018 [10]  | Belgium                                                                                             | Investigator-initiated | Novel approach      | Registrational | Adjunctive direct thrombin inhibitor        | 354        | 94         | 47         | 47              | Yes                  |
| Geriak <i>et al</i> , 2019 [11]      | USA                                                                                                 | Investigator-initiated | Combination therapy | Strategy       | Daptomycin + ceftaroline vs. SOC            | –          | 40         | 23         | 17              | No (efficacy)        |
| Tong <i>et al</i> , 2020 [12]        | Australia, Singapore, Israel, New Zealand                                                           | Investigator-initiated | Combination therapy | Strategy       | Vancomycin/daptomycin ± ASBL (MRSA)         | 1431       | 356        | 175        | 170             | No (safety)          |
| Fowler <i>et al</i> , 2020 [13]      | USA, Belgium, Bulgaria, Chile, France, Germany, Greece, Guatemala, Israel, Italy, Russia, Spain, UK | Industry-sponsored     | Novel approach      | Registrational | Adjunctive Exebecase                        | 3729       | 116        | 45         | 71              | Yes                  |
| Pujol <i>et al</i> , 2021 [14]       | Spain                                                                                               | Investigator-initiated | Combination therapy | Strategy       | Daptomycin ± Fosfomycin (MRSA)              | 674        | 167        | 81         | 74              | Yes                  |
| Cheng <i>et al</i> , 2021 [15]       | Canada                                                                                              | Investigator-initiated | Combination therapy | Strategy       | Adjunctive daptomycin                       | 331        | 115        | 51         | 53              | Yes                  |

SOC: standard of care; ASBL: anti-staphylococcal beta-lactam

\*eligible and included in analysis

**Supplementary Table 4: Included observational cohort studies (n=14)**

| <b>Study</b>                       | <b>Location</b> | <b>N included</b> |
|------------------------------------|-----------------|-------------------|
| Fowler <i>et al</i> , 2003 [16]    | USA             | 724               |
|                                    | Germany         | 912 (“INSTINCT”)  |
|                                    | Spain           | 527 (“ES1”)       |
| Kaasch <i>et al</i> , 2014 [17]    | UK              | 1459 (“UKCIRG”)   |
|                                    | USA             | 329 (“SABG”)      |
| Kaech <i>et al</i> , 2006 [18]     | Switzerland     | 308               |
| Laupland <i>et al</i> , 2008 [19]  | Canada          | 1542              |
| Le Moing <i>et al</i> , 2015 [20]  | France          | 2008              |
| Turnidge <i>et al</i> , 2009 [21]  | Australia       | 1994              |
| Morris & Russell, 2016 [22]        | UK              | 556               |
| Tong <i>et al</i> , 2012 [23]      | Australia       | 7539              |
| Jenkins <i>et al</i> , 2008 [24]   | USA             | 234               |
| Robinson <i>et al</i> , 2012 [25]  | Australia       | 599               |
| Fowler <i>et al</i> , 1998 [26]    | USA             | 244               |
| Khatib <i>et al</i> , 2006 [27]    | USA             | 245               |
| Willekens <i>et al</i> , 2021 [28] | Spain           | 441               |
| Soulie <i>et al</i> , 2019 [29]    | USA             | 2348              |

**Supplementary Table 5: Clinically-relevant poorly justified exclusion criteria**

| Exclusion                                                              | N trials |
|------------------------------------------------------------------------|----------|
| SAB source                                                             |          |
| Osteomyelitis                                                          | 1        |
| Central line                                                           | 1        |
| SAB features/severity                                                  |          |
| Metastatic infection                                                   | 1        |
| Persistent bacteraemia                                                 | 1        |
| Shock                                                                  | 4        |
| IE likely to undergo surgery                                           | 3        |
| Patient characteristics                                                |          |
| Prosthetic heart valves                                                | 1        |
| Neutropenia                                                            | 3        |
| Person who injects drugs*                                              | 1        |
| Source control                                                         |          |
| Treatable source will not removed/debrided within 72h of randomisation | 1        |
| Removable source of infection not planned to be removed within 24h     | 1        |

\*Based on the Van Spall framework[30], exclusion can be *potentially* justified on the basis that an individual "may not adhere to intervention" or "may not complete follow-up" and this could potentially be applied to people who inject drugs (PWID). For example, a recent cohort study found that of 307 PWID being treated in hospital with intravenous antimicrobials for an invasive infection, 48.8% completed IV therapy[31]. However, the framework also includes exclusion based on "Chronic health condition" as a *poorly* justified reason for exclusion. Considering the chronic nature of opioid use disorder and the relevance of injection drug use to SAB (Supplementary Figure 6) we feel that on balance exclusion of PWID is poorly justified.

**Supplementary Table 6: Microbiologic outcome definitions**

| <b>Outcome</b>    | <b>Definition used</b>                                                                     | <b>N trials</b> |
|-------------------|--------------------------------------------------------------------------------------------|-----------------|
| <b>Clearance</b>  | <i>Absence of</i> clearance: persistently positive blood cultures at the defined timepoint | 8/14            |
|                   | Negative blood cultures, obtained on one day at/from the defined timepoint                 | 3/14            |
|                   | Negative blood cultures, obtained on two consecutive days at/from the defined timepoint    | 3/14            |
| <b>Recurrence</b> | Positive blood culture following:                                                          |                 |
|                   | Clinical improvement                                                                       | 2/9*            |
|                   | Two negative blood cultures                                                                | 2/9*            |
|                   | ≥48 hours after ≥1 negative blood culture                                                  | 2/9*            |
|                   | Completion of treatment and ≥1 negative blood culture                                      | 2/9*            |
|                   | ≥72h after a negative blood culture                                                        | 1/9*            |

\*9/11 studies reporting recurrence provided a definition

**Supplementary Table 7: SAB RCT and observational study 84-90d mortality**

| Study                            | Mortality timepoint (d) <sup>a</sup> | Mortality (%) <sup>b</sup> |
|----------------------------------|--------------------------------------|----------------------------|
| <b>RCT</b>                       |                                      |                            |
| Geriak <i>et al</i> , 2019       | 90                                   | 30                         |
| Davis <i>et al</i> , 2016        | 90                                   | 21                         |
| Peetermans <i>et al</i> , 2018   | 90                                   | 19                         |
| Cheng <i>et al</i> , 2021        | 90                                   | 17.7                       |
| Tong <i>et al</i> , 2020         | 90                                   | 16                         |
| Ruotsalainen <i>et al</i> , 2006 | 90                                   | 14                         |
| Stryjewski <i>et al</i> , 2014   | 84                                   | 10                         |
| Thwaites <i>et al</i> , 2018     | 84                                   | 14                         |
| <b>Observational</b>             |                                      |                            |
| INSTINCT                         | 90                                   | 30.7                       |
| ES1                              | 90                                   | 24.8                       |
| UKCIRG                           | 90                                   | 30.2                       |
| SABG                             | 90                                   | 22.2                       |
| Le Moing <i>et al</i> , 2015     | 84                                   | 31.3                       |
| Fowler <i>et al</i> , 2003       | 84                                   | 28 <sup>c</sup>            |
| Souli <i>et al</i> , 2019        | 90                                   | 26.5                       |

Unless otherwise stated, mortality is crude/all-cause.

<sup>a</sup> After enrolment or qualifying blood culture

<sup>b</sup> Control arm for RCTs

<sup>c</sup> Attributable mortality



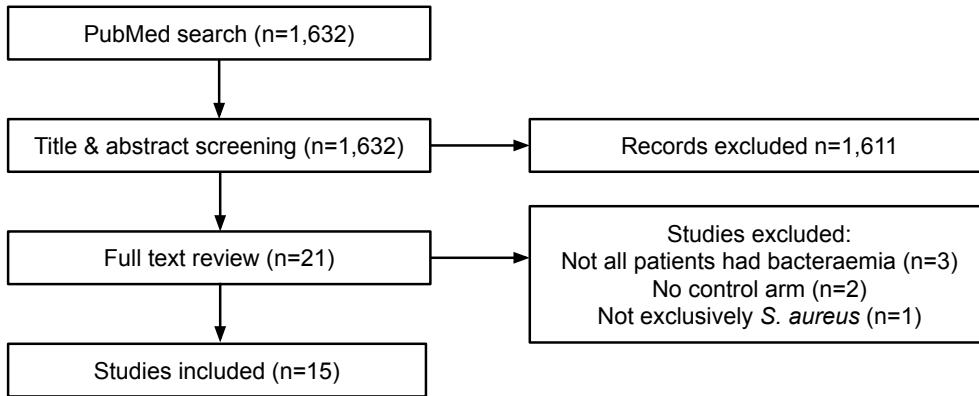

**Supplementary Figure 1: Flow diagram of study identification**

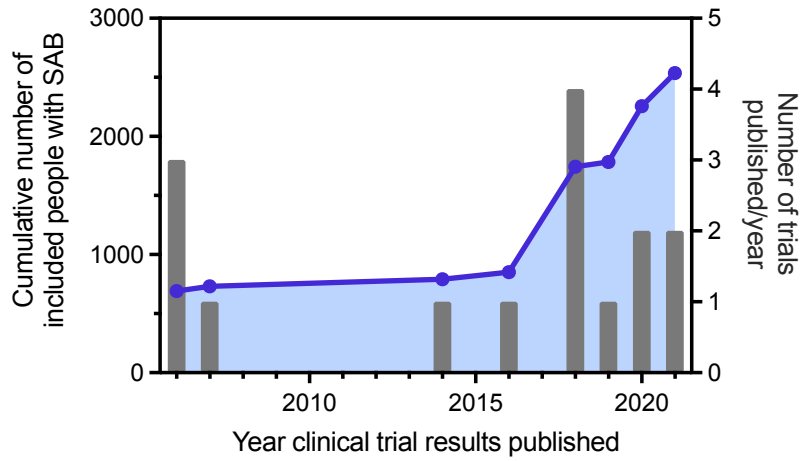

**Supplementary Figure 2: Cumulative recruitment to SAB RCTs**

The cumulative number of recruited people over time is shown by the blue line (left y-axis). Grey bars represent the number of trials published per year (right y-axis).

**A Clinical trial details**

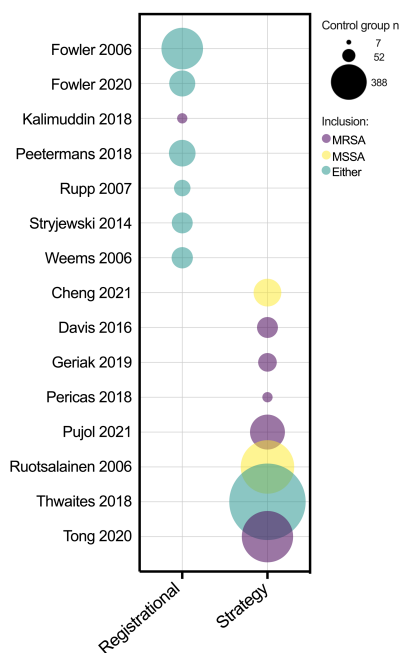

**B Cohort characteristics reported**

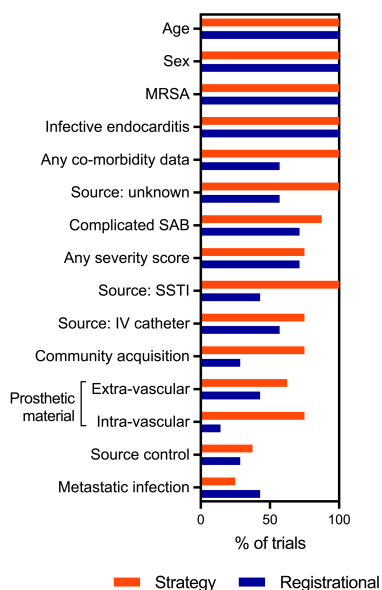

**C Inter-trial variation in cohort characteristics within registrational and strategy trials**

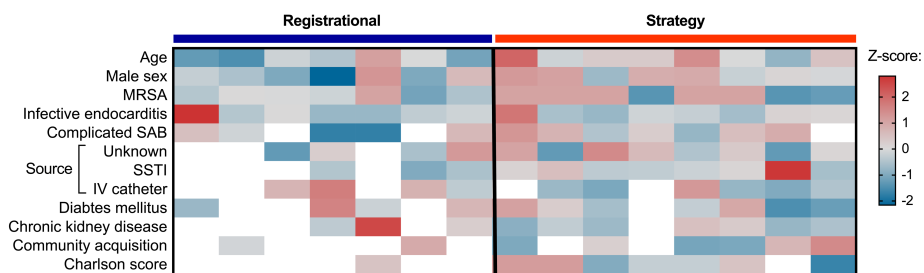

**D Comparison of selected cohort characteristics between registrational and strategy trials**

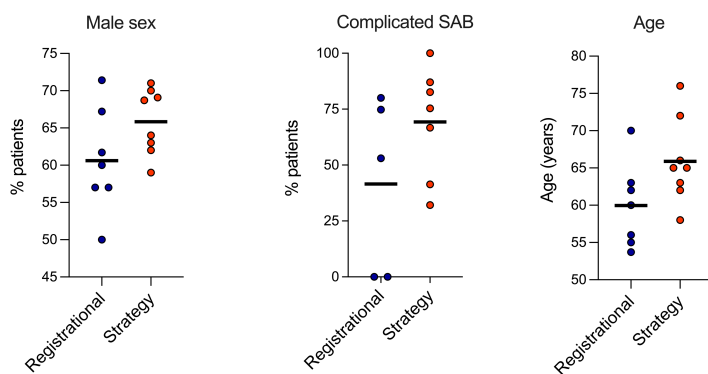

**Supplementary Figure 3: Comparison of registrational and strategy trials**

**(A)** Details of SAB RCTs stratified by trial purpose. The size of the bubble is proportional to the number of participants in the control arm. Bubbles are coloured according to the inclusion of MSSA, MRSA or both. **(B)** Cohort characteristics reported in included trials, stratified by trial purpose. **(C)** Variability in cohort characteristics between trials. Cells in the heatmap are shaded by z-score. Only variables reported in >50% of all trials were included. Blank cells represent missing values. **(D)** Comparison of selected cohort characteristics between registrational and strategy trials. Each data point represents one study. The line shows the mean (data normally distributed).

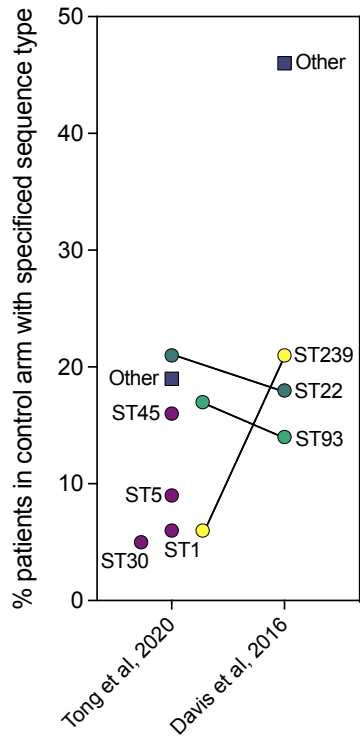

**Supplementary Figure 4: Variation in *S. aureus* sequence types between trials**

Two trials reported MLST data for *S. aureus* isolates; both trials recruited specifically MRSA bacteraemia. One trial was conducted in Australian hospitals[6] and the other was conducted in Australia, Singapore, Israel and New Zealand[12]. Data points in the figure represent MRSA sequence types. Lines connect data for the same sequence types reported by both trials.

### A All trials

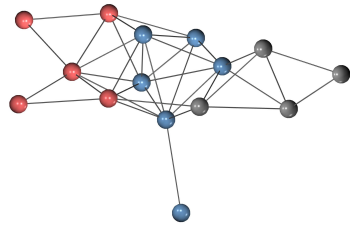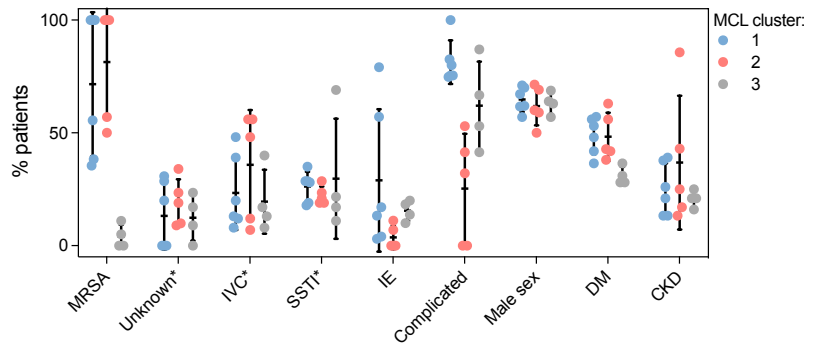

### B MRSA only

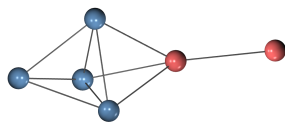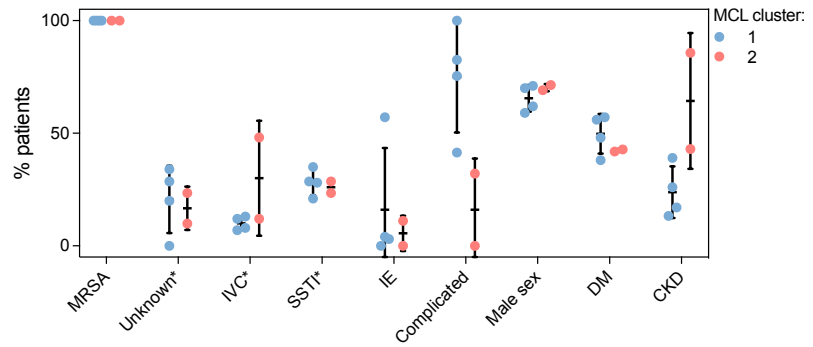

### C Mixed/MSSA

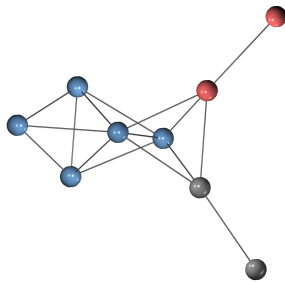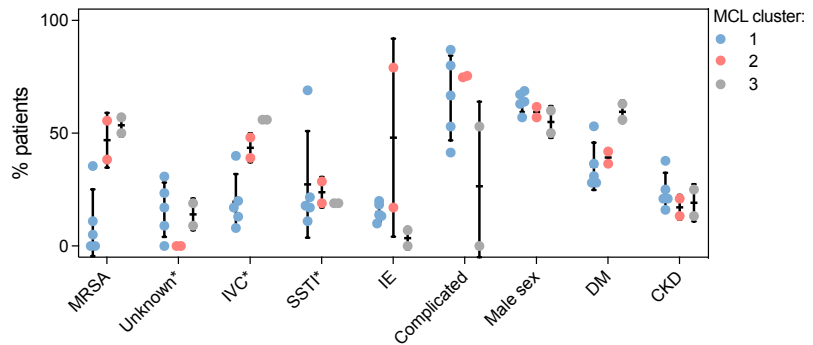

## Supplementary Figure 5: Network analysis of SAB RCT cohort characteristics

Cohort characteristics were used to identify clusters of trials with similar patients included. Nodes in the network diagrams represent individual trials and are coloured by cluster membership, determined using the Markov Clustering Algorithm (a granularity of 2.6 was applied to identify >1 cluster per network). Edges represent connections with a Pearson correlation value of  $\geq 0.62$  (chosen to keep all trials in a single network). Inset dot plots show the distribution of cohort characteristics across the clusters identified in the corresponding network analysis. Lines show mean and standard deviation. Each data point represents one trial.

IVC: IV catheter; SSTI: skin and soft tissue infection; IE: infective endocarditis; DM: diabetes mellitus; CKD: chronic kidney disease.

\* denotes source of SAB.

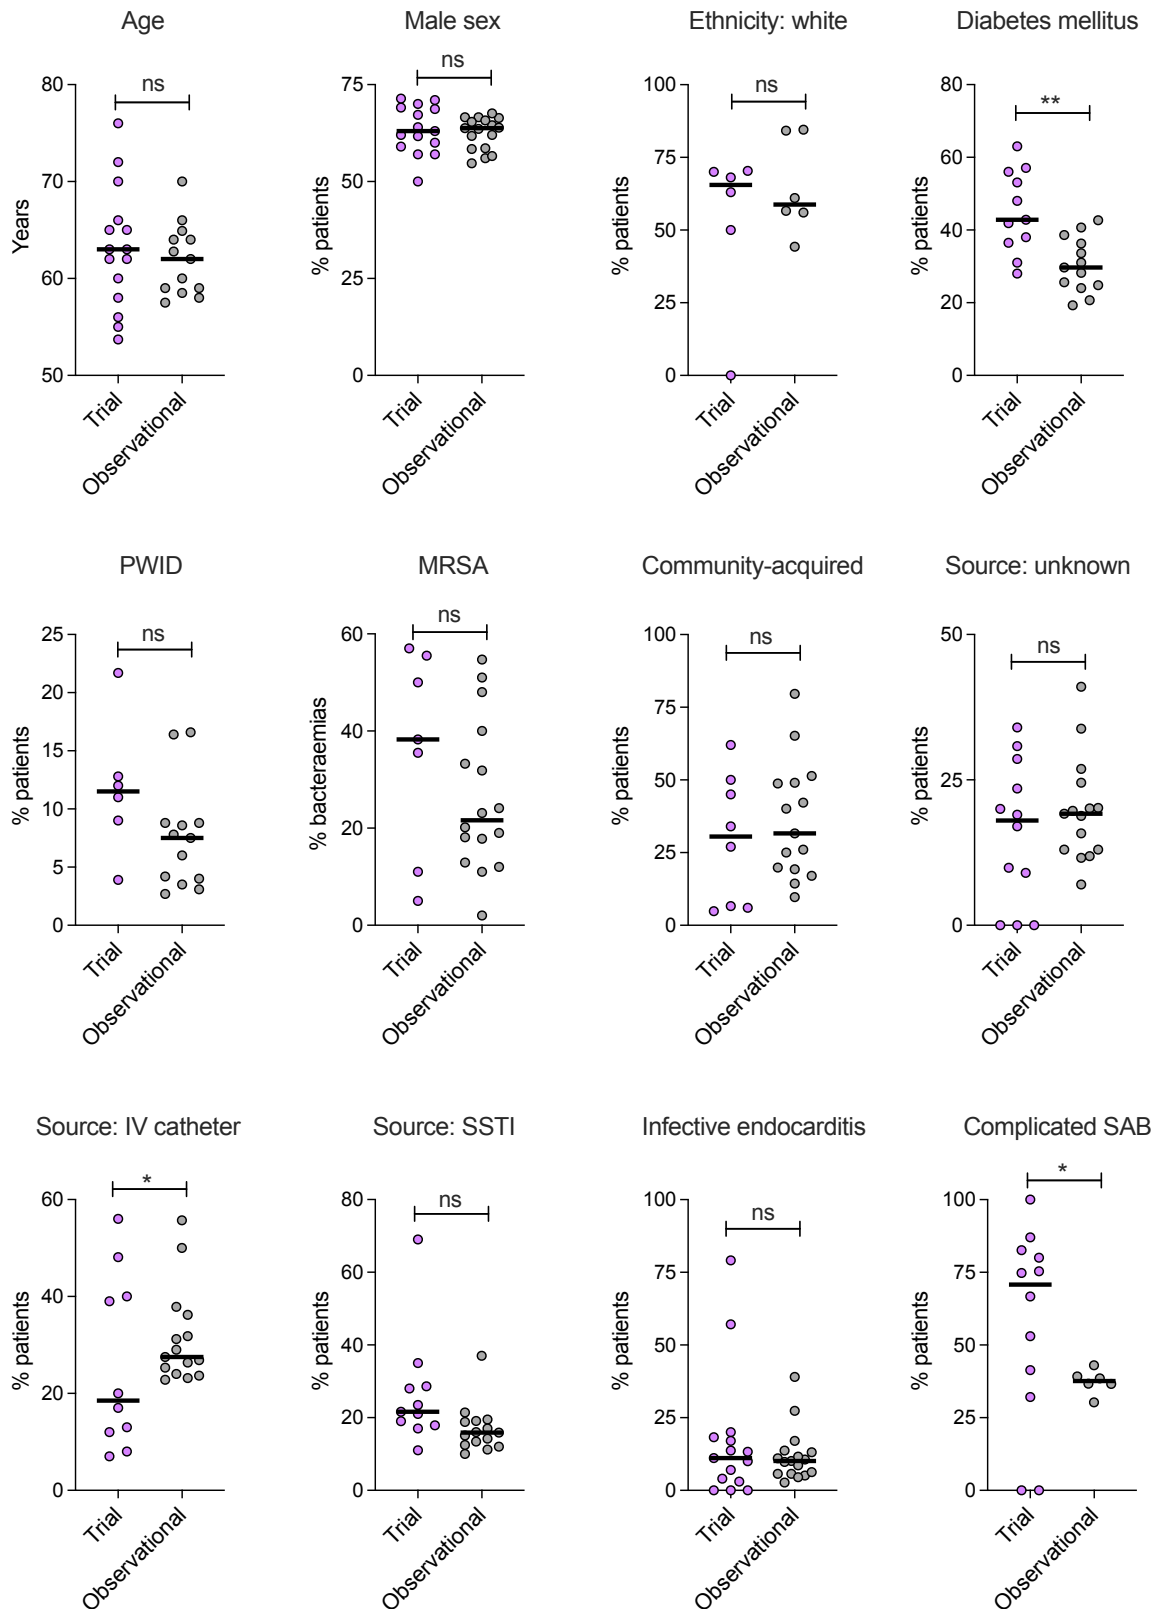

**Supplementary Figure 6: SAB RCT and observational study cohort characteristics**

Each data point represents one study. The line shows the median. Results of univariable analyses are shown, using unpaired t-tests (parametric data) or Mann-Whitney tests (non-parametric). Trials restricted to MRSA or MSSA only were excluded from the MRSA analysis shown here.

\* p<0.05; \*\* p<0.01; ns: not significant.

PWID: person who injects drugs; IV: intravenous; SSTI: skin and soft tissue infection.

## Supplementary references

1. Fowler VG, Jr., Boucher HW, Corey GR, et al. Daptomycin versus standard therapy for bacteremia and endocarditis caused by *Staphylococcus aureus*. *N Engl J Med* **2006**; 355(7): 653-65.
2. Ruotsalainen E, Järvinen A, Koivula I, et al. Levofloxacin does not decrease mortality in *Staphylococcus aureus* bacteraemia when added to the standard treatment: a prospective and randomized clinical trial of 381 patients. *J Intern Med* **2006**; 259(2): 179-90.
3. Weems JJ, Jr., Steinberg JP, Filler S, et al. Phase II, randomized, double-blind, multicenter study comparing the safety and pharmacokinetics of tefibazumab to placebo for treatment of *Staphylococcus aureus* bacteremia. *Antimicrob Agents Chemother* **2006**; 50(8): 2751-5.
4. Rupp ME, Holley HP, Jr., Lutz J, et al. Phase II, randomized, multicenter, double-blind, placebo-controlled trial of a polyclonal anti-*Staphylococcus aureus* capsular polysaccharide immune globulin in treatment of *Staphylococcus aureus* bacteremia. *Antimicrob Agents Chemother* **2007**; 51(12): 4249-54.
5. Stryjewski ME, Lentnek A, O'Riordan W, et al. A randomized Phase 2 trial of telavancin versus standard therapy in patients with uncomplicated *Staphylococcus aureus* bacteremia: the ASSURE study. *BMC Infect Dis* **2014**; 14: 289.
6. Davis JS, Sud A, O'Sullivan MVN, et al. Combination of Vancomycin and  $\beta$ -Lactam Therapy for Methicillin-Resistant *Staphylococcus aureus* Bacteremia: A Pilot Multicenter Randomized Controlled Trial. *Clin Infect Dis* **2016**; 62(2): 173-80.
7. Kalimuddin S, Chan YFZ, Phillips R, et al. A randomized phase 2B trial of vancomycin versus daptomycin for the treatment of methicillin-resistant *Staphylococcus aureus* bacteremia due to isolates with high vancomycin minimum inhibitory concentrations - results of a prematurely terminated study. *Trials* **2018**; 19(1): 305.
8. Pericàs JM, Moreno A, Almela M, et al. Efficacy and safety of fosfomycin plus imipenem versus vancomycin for complicated bacteraemia and endocarditis due to methicillin-resistant *Staphylococcus aureus*: a randomized clinical trial. *Clin Microbiol Infect* **2018**; 24(6): 673-6.
9. Thwaites GE, Scarborough M, Szubert A, et al. Adjunctive rifampicin for *Staphylococcus aureus* bacteraemia (ARREST): a multicentre, randomised, double-blind, placebo-controlled trial. *Lancet* **2018**; 391(10121): 668-78.
10. Peetermans M, Liesenborghs L, Peerlinck K, et al. Targeting Coagulase Activity in *Staphylococcus aureus* Bacteraemia: A Randomized Controlled Single-Centre Trial of Staphylothrombin Inhibition. *Thromb Haemost* **2018**; 118(5): 818-29.
11. Geriak M, Haddad F, Rizvi K, et al. Clinical Data on Daptomycin plus Ceftaroline versus Standard of Care Monotherapy in the Treatment of Methicillin-Resistant *Staphylococcus aureus* Bacteremia. *Antimicrob Agents Chemother* **2019**; 63(5).
12. Tong SYC, Lye DC, Yahav D, et al. Effect of Vancomycin or Daptomycin With vs Without an Antistaphylococcal  $\beta$ -Lactam on Mortality, Bacteremia, Relapse, or Treatment Failure in Patients With MRSA Bacteremia: A Randomized Clinical Trial. *Jama* **2020**; 323(6): 527-37.
13. Fowler VG, Jr., Das AF, Lipka-Diamond J, et al. Exebacase for patients with *Staphylococcus aureus* bloodstream infection and endocarditis. *J Clin Invest* **2020**; 130(7): 3750-60.
14. Pujol M, Miró JM, Shaw E, et al. Daptomycin Plus Fosfomycin Versus Daptomycin Alone for Methicillin-resistant *Staphylococcus aureus* Bacteremia and Endocarditis: A Randomized Clinical Trial. *Clin Infect Dis* **2021**; 72(9): 1517-25.
15. Cheng MP, Lawandi A, Butler-Laporte G, De l'Étoile-Morel S, Paquette K, Lee TC. Adjunctive Daptomycin in the Treatment of Methicillin-susceptible *Staphylococcus aureus* Bacteremia: A Randomized, Controlled Trial. *Clin Infect Dis* **2021**; 72(9): e196-e203.
16. Fowler VG, Jr., Olsen MK, Corey GR, et al. Clinical identifiers of complicated *Staphylococcus aureus* bacteremia. *Arch Intern Med* **2003**; 163(17): 2066-72.

17. Kaasch AJ, Barlow G, Edgeworth JD, et al. Staphylococcus aureus bloodstream infection: a pooled analysis of five prospective, observational studies. *J Infect* **2014**; 68(3): 242-51.
18. Kaech C, Elzi L, Sendi P, et al. Course and outcome of Staphylococcus aureus bacteraemia: a retrospective analysis of 308 episodes in a Swiss tertiary-care centre. *Clin Microbiol Infect* **2006**; 12(4): 345-52.
19. Laupland KB, Ross T, Gregson DB. Staphylococcus aureus bloodstream infections: risk factors, outcomes, and the influence of methicillin resistance in Calgary, Canada, 2000-2006. *J Infect Dis* **2008**; 198(3): 336-43.
20. Le Moing V, Alla F, Doco-Lecompte T, et al. Staphylococcus aureus Bloodstream Infection and Endocarditis--A Prospective Cohort Study. *PLoS One* **2015**; 10(5): e0127385.
21. Turnidge JD, Kotsanas D, Munckhof W, et al. Staphylococcus aureus bacteraemia: a major cause of mortality in Australia and New Zealand. *Med J Aust* **2009**; 191(7): 368-73.
22. Morris AK, Russell CD. Enhanced surveillance of Staphylococcus aureus bacteraemia to identify targets for infection prevention. *J Hosp Infect* **2016**; 93(2): 169-74.
23. Tong SY, van Hal SJ, Einsiedel L, Currie BJ, Turnidge JD. Impact of ethnicity and socio-economic status on Staphylococcus aureus bacteremia incidence and mortality: a heavy burden in Indigenous Australians. *BMC Infect Dis* **2012**; 12: 249.
24. Jenkins TC, Price CS, Sabel AL, Mehler PS, Burman WJ. Impact of routine infectious diseases service consultation on the evaluation, management, and outcomes of Staphylococcus aureus bacteremia. *Clin Infect Dis* **2008**; 46(7): 1000-8.
25. Robinson JO, Pozzi-Langhi S, Phillips M, et al. Formal infectious diseases consultation is associated with decreased mortality in Staphylococcus aureus bacteraemia. *Eur J Clin Microbiol Infect Dis* **2012**; 31(9): 2421-8.
26. Fowler VG, Jr., Sanders LL, Sexton DJ, et al. Outcome of Staphylococcus aureus bacteremia according to compliance with recommendations of infectious diseases specialists: experience with 244 patients. *Clin Infect Dis* **1998**; 27(3): 478-86.
27. Khatib R, Johnson LB, Fakhri MG, et al. Persistence in Staphylococcus aureus bacteremia: incidence, characteristics of patients and outcome. *Scand J Infect Dis* **2006**; 38(1): 7-14.
28. Willekens R, Puig-Asensio M, Suanzes P, et al. "Mortality in Staphylococcus aureus bacteraemia remains high despite adherence to quality indicators: secondary analysis of a prospective cohort study". *J Infect* **2021**.
29. Souli M, Ruffin F, Choi SH, et al. Changing Characteristics of Staphylococcus aureus Bacteremia: Results From a 21-Year, Prospective, Longitudinal Study. *Clin Infect Dis* **2019**; 69(11): 1868-77.
30. Van Spall HG, Toren A, Kiss A, Fowler RA. Eligibility criteria of randomized controlled trials published in high-impact general medical journals: a systematic sampling review. *Jama* **2007**; 297(11): 1233-40.
31. Marks LR, Liang SY, Muthulingam D, et al. Evaluation of Partial Oral Antibiotic Treatment for Persons Who Inject Drugs and Are Hospitalized With Invasive Infections. *Clin Infect Dis* **2020**; 71(10): e650-e6.
